# Supplementary material for: Ticks on the move—climate change-induced range shifts of three tick species in Europe: current and future habitat suitability for Ixodes ricinus in comparison with Dermacentor reticulatus and Dermacentor marginatus
Source: Springer Nature journal article supplement (doi:10.1007/s00436-022-07556-x), 2022-06-01
Supplement: MOESM1 [file 436_2022_7556_MOESM1_ESM.pdf]

## Ticks on the move – climate change-induced range shifts of three tick species in Europe

Sarah Cunze, Gustav Glock, Judith Kochmann, Sven Klimpel

## Occurrence data

Table S1: Numbers of occurrence records (raw data) by species and source. Estrada-Peña et al. 2016 (<https://doi.org/10.5061/dryad.2h3f2>); GBIF 2020a (<https://doi.org/10.15468/dl.8tr4te>), GBIF 2020b (<https://doi.org/10.15468/dl.qyk2m3>), GBIF 2020c (<https://doi.org/10.15468/dl.tt6rkm>) and Rubel et al. 2016 (<https://doi.org/10.1016/j.ttbdis.2015.10.015>).

| <i>Ixodes ricinus</i> | <i>Dermacentor reticulatus</i> | <i>Dermacentor marginatus</i> | Reference                |
|-----------------------|--------------------------------|-------------------------------|--------------------------|
| 1196                  | 29                             | 378                           | Estrada-Peña et al. 2016 |
| 2550                  |                                |                               | GBIF 2020a               |
|                       |                                | 104                           | GBIF 2020b               |
|                       | 201                            |                               | GBIF 2020c               |
|                       | 719                            |                               | Rubel et al. 2016        |
|                       |                                | 826                           | Rubel et al. 2016        |
| <b>3746</b>           | <b>949</b>                     | <b>1308</b>                   |                          |

## Ticks on the move – climate change-induced range shifts of three tick species in Europe

Sarah Cunze, Gustav Glock, Judith Kochmann, Sven Klimpel

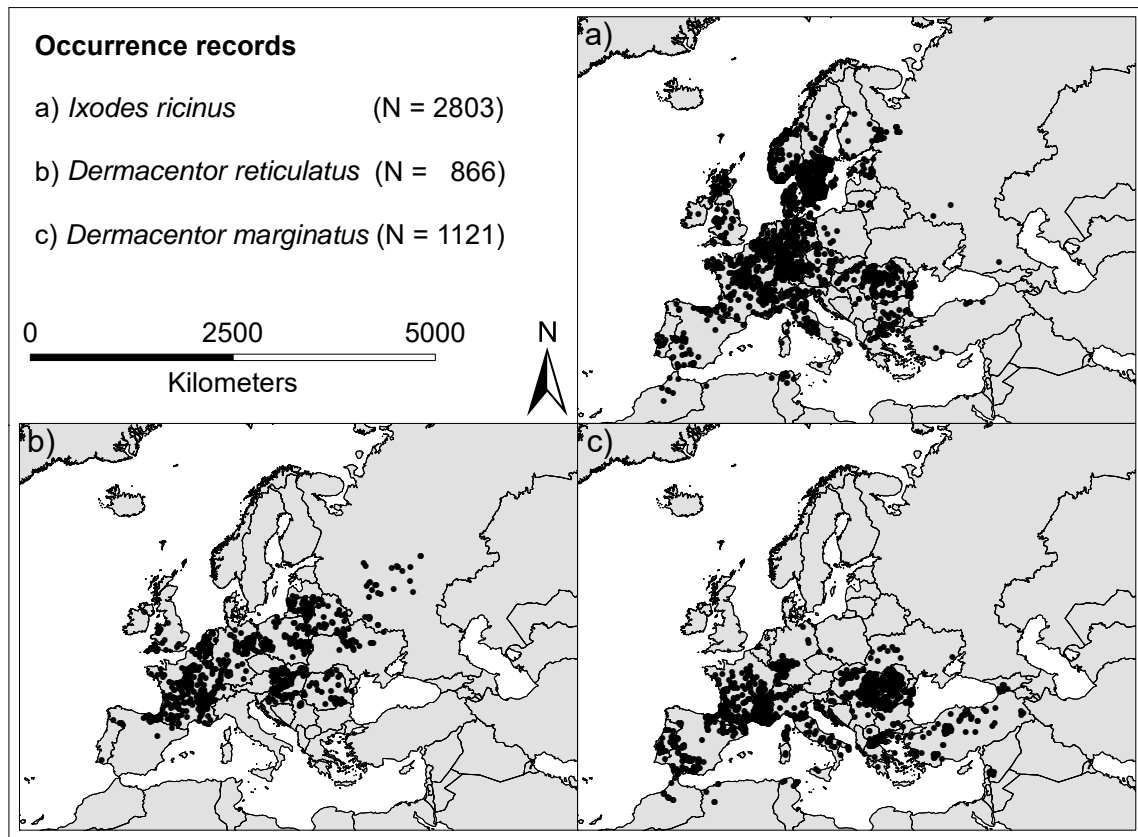

Figure S1: Occurrence data used for modelling. a) *Ixodes ricinus*, b) *Dermacentor reticulatus*, c) *Dermacentor marginatus*. Maps were built using ESRI ArcGIS (Release 10.8, [www.esri.com](http://www.esri.com)). Projection: Europe Albers Equal Area Conic.

## Ticks on the move – climate change-induced range shifts of three tick species in Europe

Sarah Cunze, Gustav Glock, Judith Kochmann, Sven Klimpel

## Environmental variables

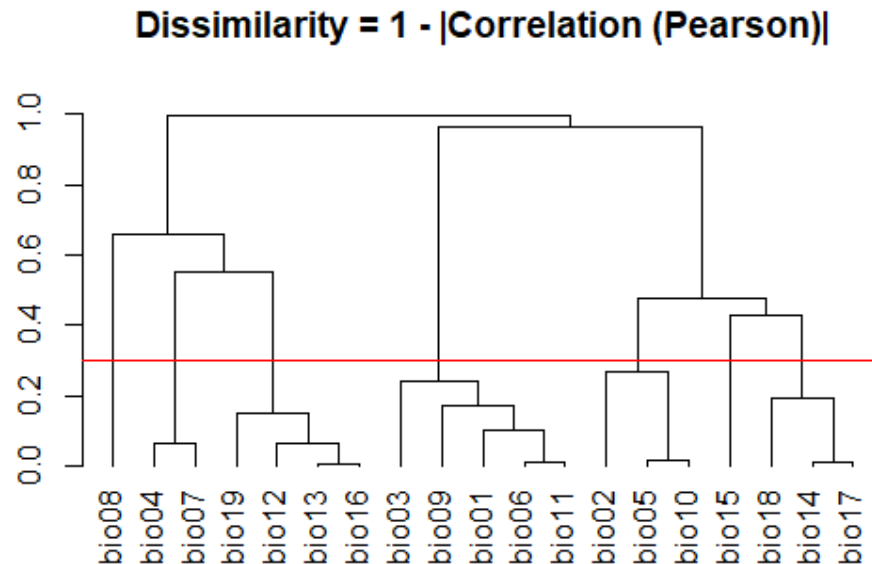

Figure S2: Variable selection. For the 19 bioclimatic variables provided by worldclim, we generated a dendrogram based on the “1 - Pearson correlation coefficients” – dissimilarity (method: complete linkage). We built groups of interrelated variables (with threshold of 0.3 – red line). After excluding bio08, bio09, bio18 and bio 19, which are effected by artefacts, we chose one representative of each group that is considered ecologically relevant and easy to interpret. Specifically we chose: bio04 (temperature seasonality), bio05 (maximum temperature of warmest month), bio06 (minimum temperature of the coldest month), bio12 (annual precipitation), bio14 (precipitation of the driest month) and bio15 (precipitation seasonality).

Ticks on the move – climate change-induced range shifts of three tick species in Europe

Sarah Cunze, Gustav Glock, Judith Kochmann, Sven Klimpel

Additional results

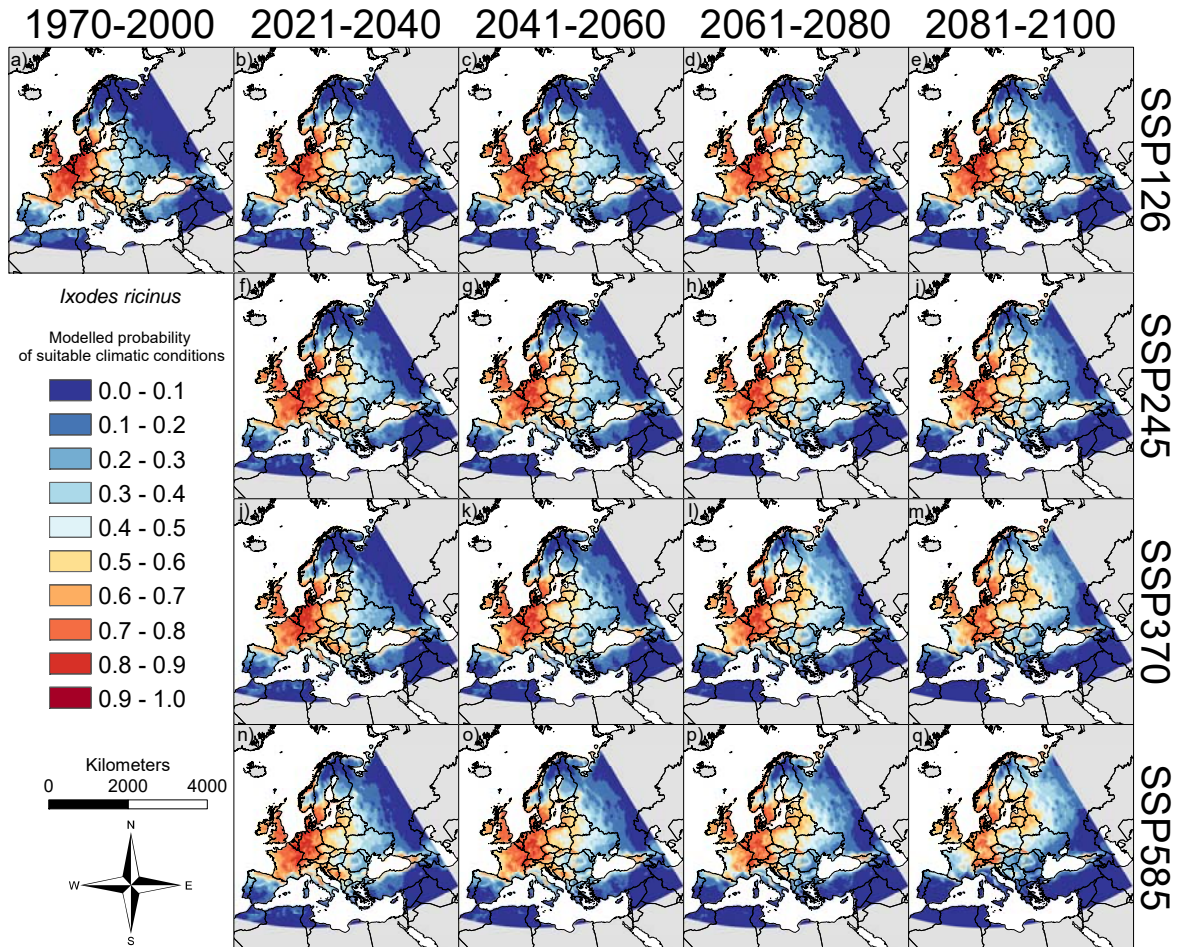

Figure S3: Modelled probability that climatic conditions are suited for *Ixodes ricinus* in Europe under current and future climatic conditions accounting for different SSP scenarios and time periods. Warmer colours indicate higher projected probability (AUC = 0.7917 +/- 0.000641959, unregularised test gain = 0.5913 +/- 0.03635144 – 10 replicates). Maps were built using ESRI ArcGIS (Release 10.8, www.esri.com). Projection: Europe Albers Equal Area Conic.

Ticks on the move – climate change-induced range shifts of three tick species in Europe

Sarah Cunze, Gustav Glock, Judith Kochmann, Sven Klimpel

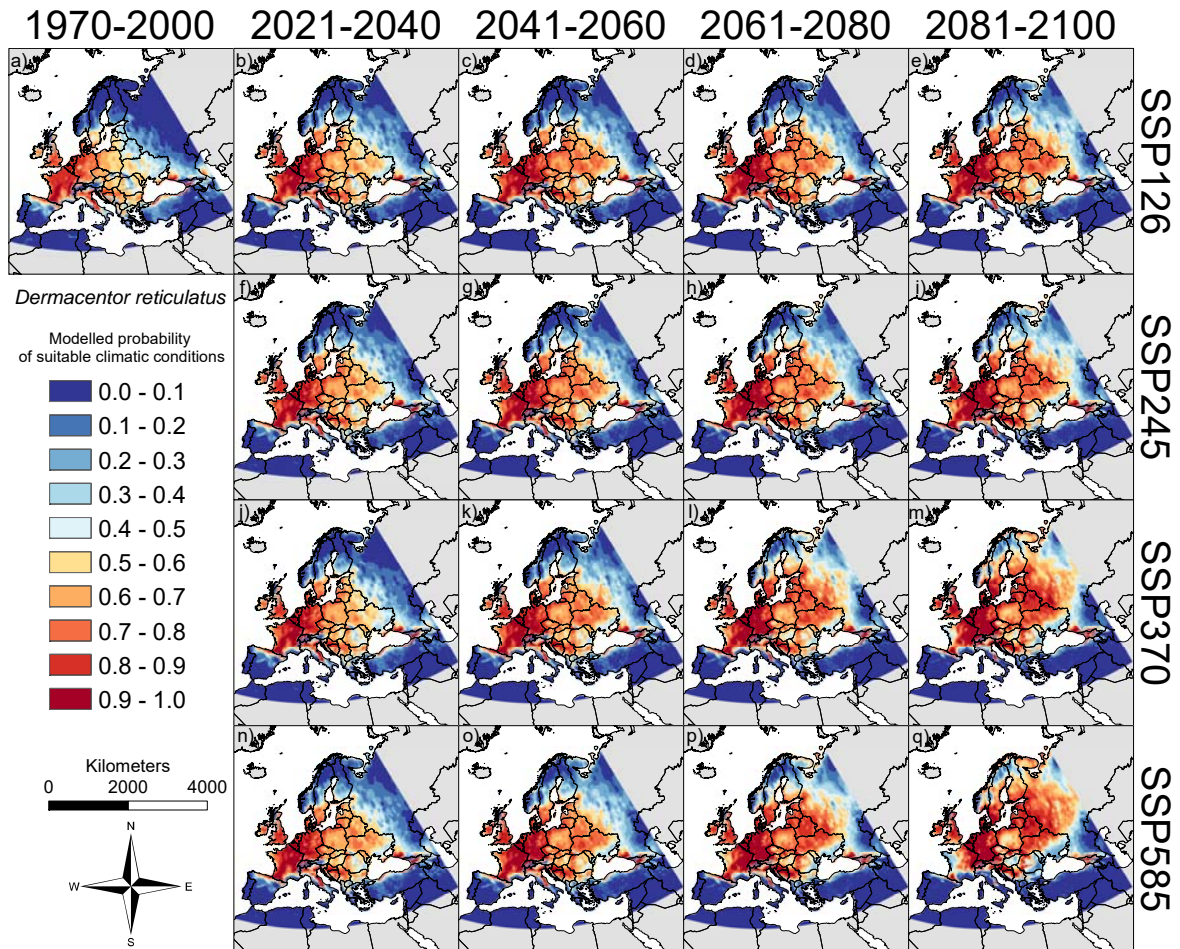

Figure S4: Modelled probability that climatic conditions are suited for *Dermacentor reticulatus* in Europe under current and future climatic conditions accounting for different SSP scenarios and time periods. Warmer colours indicate higher projected probability (AUC = 0.8333 +/- 0.001113603, unregularised test gain = 0.7807 +/- 0.00942708 – 10 replicates). Maps were built using ESRI ArcGIS (Release 10.8, www.esri.com). Projection: Europe Albers Equal Area Conic.

Ticks on the move – climate change-induced range shifts of three tick species in Europe

Sarah Cunze, Gustav Glock, Judith Kochmann, Sven Klimpel

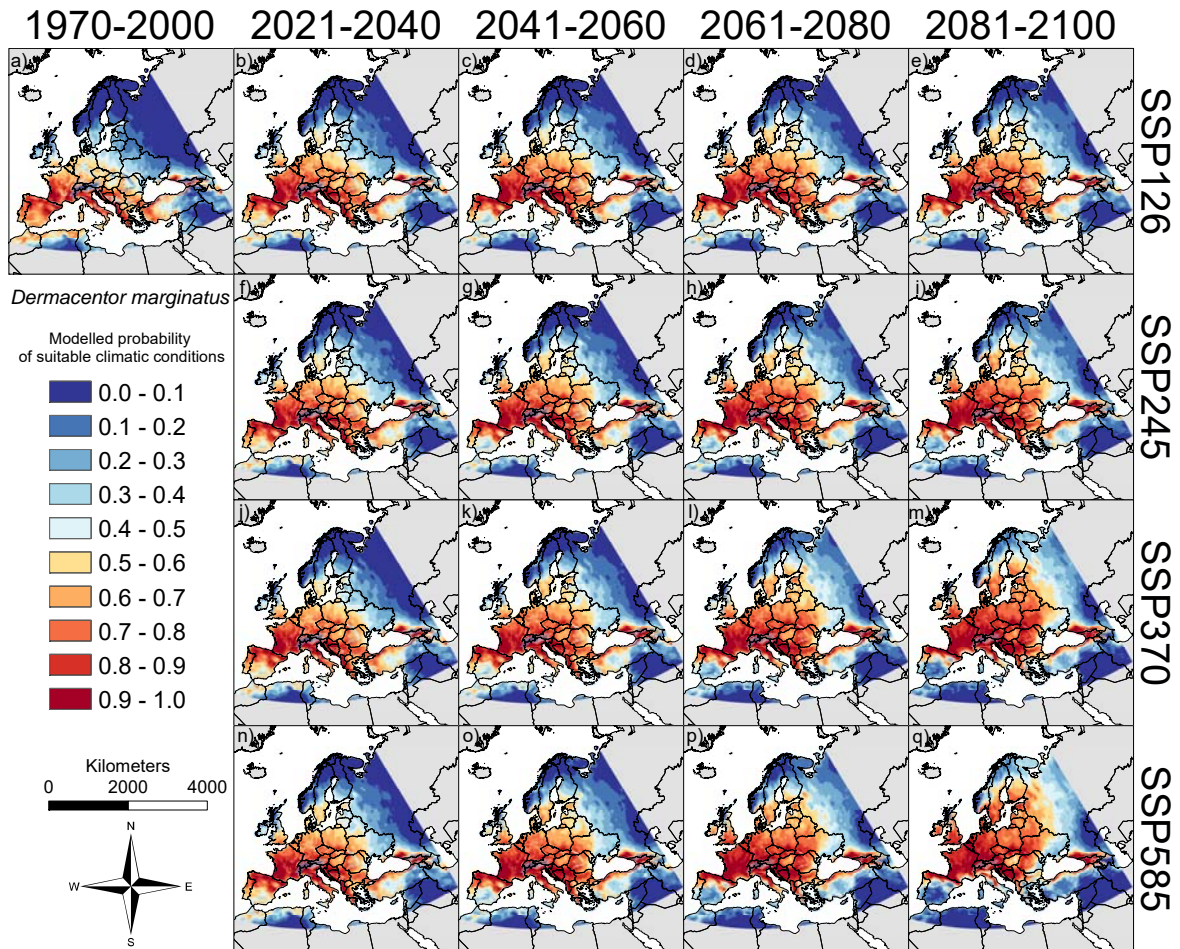

Figure S5: Modelled probability that climatic conditions are suited for *Dermacentor marginatus* in Europe under current and future climatic conditions accounting for different SSP scenarios and time periods. Warmer colours indicate higher projected probability (AUC = 0.8229 +/- 0.001121953, unregularised test gain = 0.7216 +/- 0.05255974 – 10 replicates). Maps were built using ESRI ArcGIS (Release 10.8, www.esri.com). Projection: Europe Albers Equal Area Conic.

Ticks on the move – climate change-induced range shifts of three tick species in Europe

Sarah Cunze, Gustav Glock, Judith Kochmann, Sven Klimpel

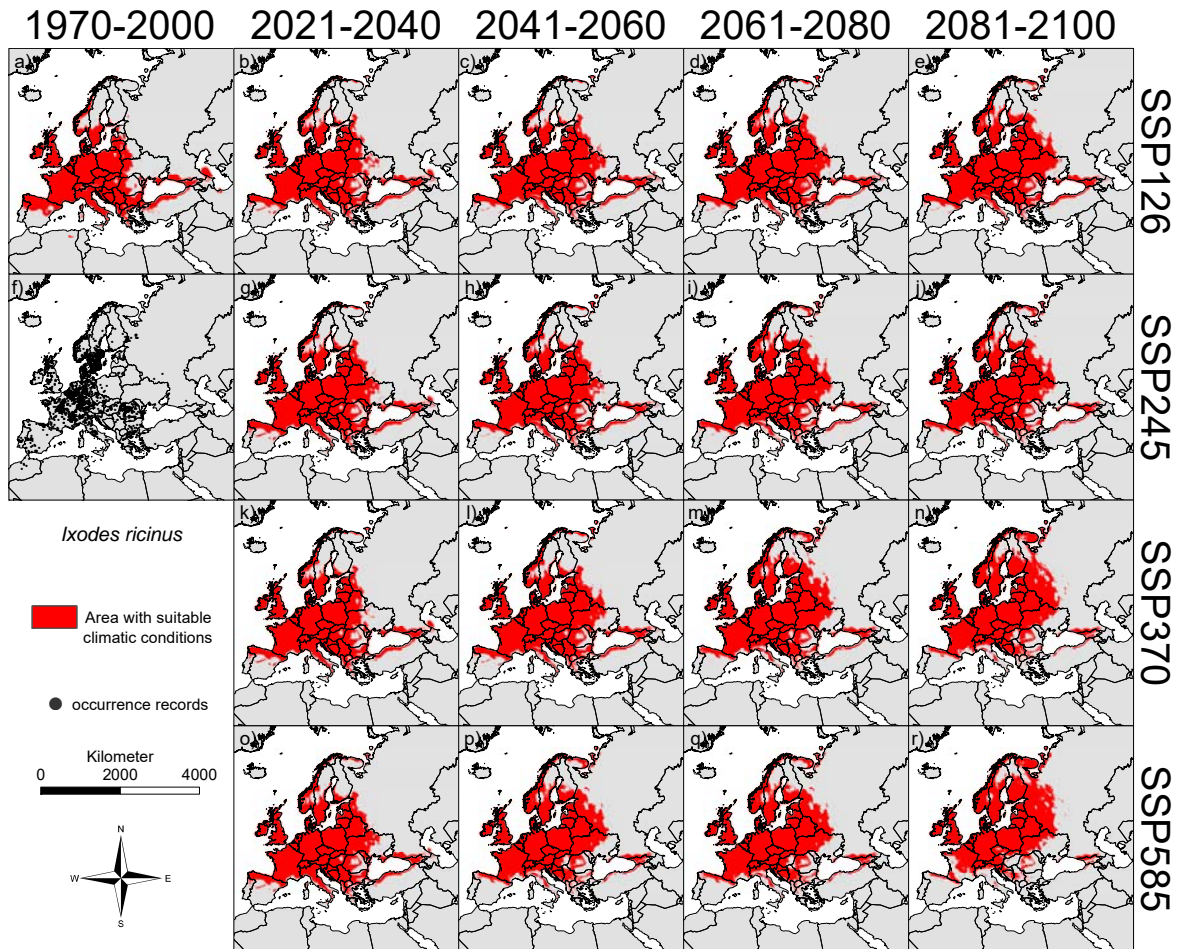

Figure S6: Area with modelled climatic suitability for *Ixodes ricinus* in Europe under current and future climatic conditions. Dichotomous modelling results using the 10% omission rate threshold ( $T = 0.3368$ ). Maps were built using ESRI ArcGIS (Release 10.8, [www.esri.com](http://www.esri.com)). Projection: Europe Albers Equal Area Conic.

### Ticks on the move – climate change-induced range shifts of three tick species in Europe

Sarah Cunze, Gustav Glock, Judith Kochmann, Sven Klimpel

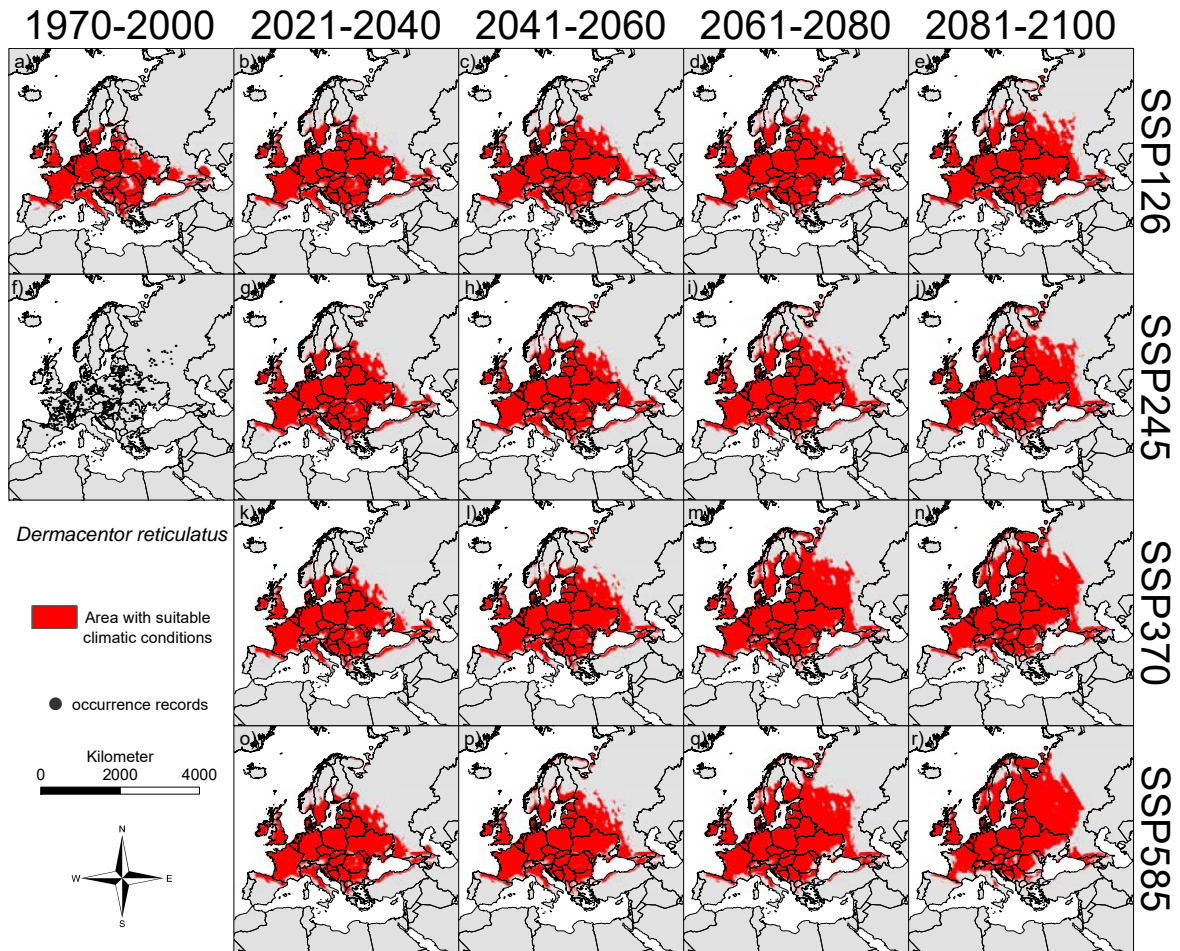

Figure S7: Area with modelled climatic suitability for *Dermacentor reticulatus* in Europe under current and future climatic conditions. Dichotomous modelling results using the 10% omission rate threshold ( $T = 0.3816$ ). Maps were built using ESRI ArcGIS (Release 10.8, [www.esri.com](http://www.esri.com)). Projection: Europe Albers Equal Area Conic.



Ticks on the move – climate change-induced range shifts of three tick species in Europe

Sarah Cunze, Gustav Glock, Judith Kochmann, Sven Klimpel

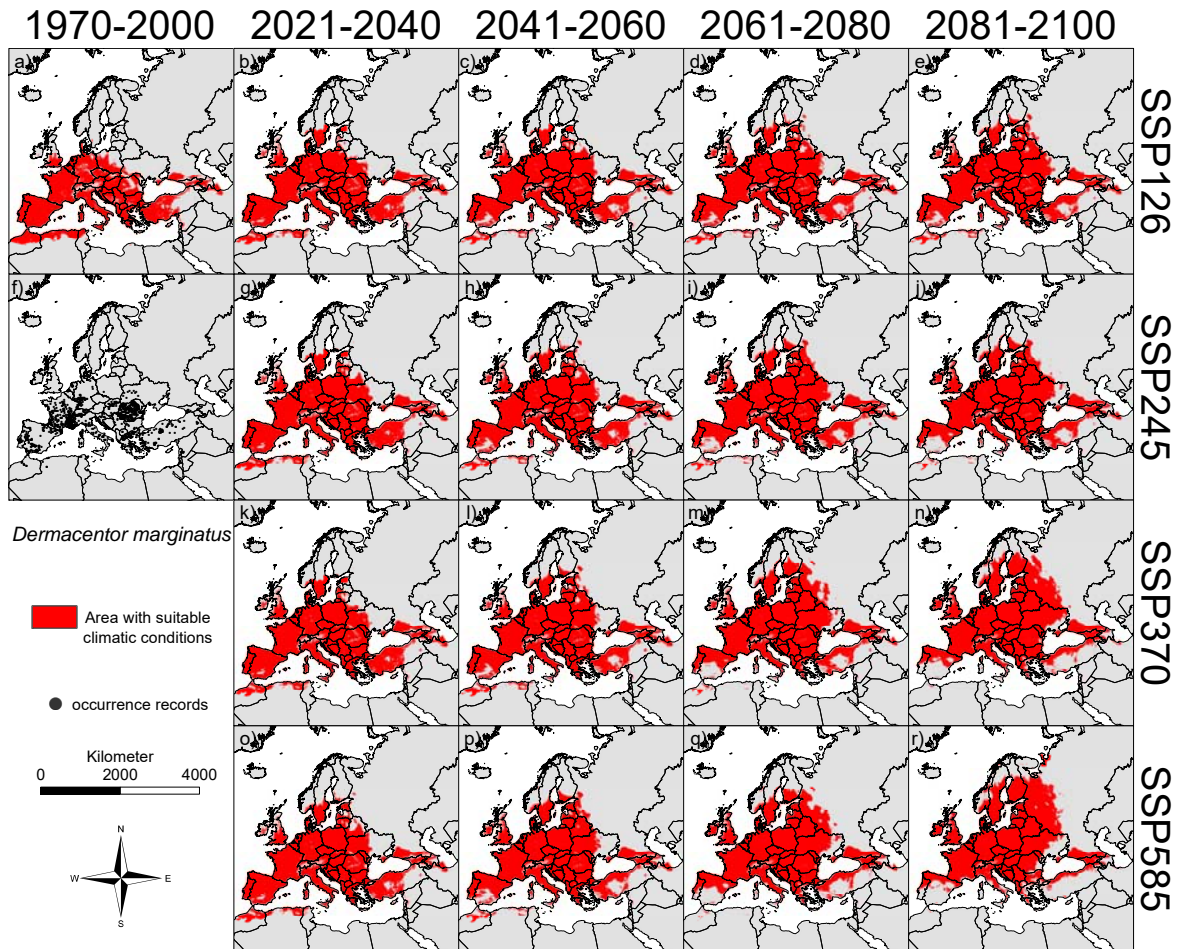

Figure S8: Area with modelled climatic suitability for *Dermacentor marginatus* in Europe under current and future climatic conditions. Dichotomous modelling results using the 10% omission rate threshold ( $T = 0.4298$ ). Maps were built using ESRI ArcGIS (Release 10.8, [www.esri.com](http://www.esri.com)). Projection: Europe Albers Equal Area Conic.

## Ticks on the move – climate change-induced range shifts of three tick species in Europe

Sarah Cunze, Gustav Glock, Judith Kochmann, Sven Klimpel

Table S2: Quantification of projected potential range changes [km<sup>2</sup>] for a) *Ixodes ricinus*, b) *Dermacentor reticulatus* and c) *D. marginatus* in Europe (cf. Figure 1.3). “Future suitable conditions” refers to the area [km<sup>2</sup>] projected as unsuitable under current climatic conditions but suitable under future climatic conditions (i.e. potential new range). “Continuing suitable conditions” refers to area [km<sup>2</sup>] projected as suitable under current climatic conditions as well as under future climatic conditions (i.e. stable presence). “Continuing unsuitable conditions” refers to area [km<sup>2</sup>] projected as unsuitable under current climatic conditions as well as under future climatic conditions (i.e. stable absence). “Future unsuitable conditions” refers to the area [km<sup>2</sup>] projected as suitable under current climatic conditions but unsuitable under future climatic conditions (i.e. potential extinction). The AUC-value refers to the average over 10 replicates using cross-validation +/- standard deviation. The threshold to transform the logistic model output was the 10% omission rate threshold. See Figure S9 in the Supplementary Material for a bar plot of the results.

| Area [km <sup>2</sup> ]           | SSP126                                           | SSP245    | SSP370    | SSP585    |
|-----------------------------------|--------------------------------------------------|-----------|-----------|-----------|
| <i>a) Ixodes ricinus</i>          | AUC = 0.7917 +/- 0.000641959, Threshold = 0.3368 |           |           |           |
| Future suitable conditions        | 1,235,391                                        | 1,159,487 | 1,807,509 | 1,892,781 |
| Continuing suitable conditions    | 3,668,562                                        | 3,417,046 | 3,147,341 | 2,684,987 |
| Continuing unsuitable conditions  | 6,026,242                                        | 6,103,370 | 5,455,814 | 5,370,348 |
| Future unsuitable conditions      | 483,078                                          | 734,232   | 1,003,375 | 1,466,367 |
| <i>b) Dermacentor reticulatus</i> | AUC = 0.8229 +/- 0.001121953, Threshold = 0.4298 |           |           |           |
| Future suitable conditions        | 1,700,162                                        | 2,221,718 | 3,134,222 | 3,267,978 |
| Continuing suitable conditions    | 3,674,916                                        | 3,509,930 | 3,245,913 | 2,883,994 |
| Continuing unsuitable conditions  | 5,815,644                                        | 5,295,235 | 4,383,977 | 4,250,759 |
| Future unsuitable conditions      | 222,659                                          | 386,589   | 649,758   | 1,011,349 |
| <i>c) Dermacentor marginatus</i>  | AUC = 0.8333 +/- 0.001113603, Threshold = 0.3816 |           |           |           |
| Future suitable conditions        | 1,690,325                                        | 2,070,758 | 2,879,620 | 3,115,149 |
| Continuing suitable conditions    | 3,542,654                                        | 3,214,374 | 2,885,468 | 2,578,350 |
| Continuing unsuitable conditions  | 5,722,006                                        | 5,342,624 | 4,534,260 | 4,299,055 |
| Future unsuitable conditions      | 528,393                                          | 855,595   | 1,183,930 | 1,490,465 |

## Ticks on the move – climate change-induced range shifts of three tick species in Europe

Sarah Cunze, Gustav Glock, Judith Kochmann, Sven Klimpel

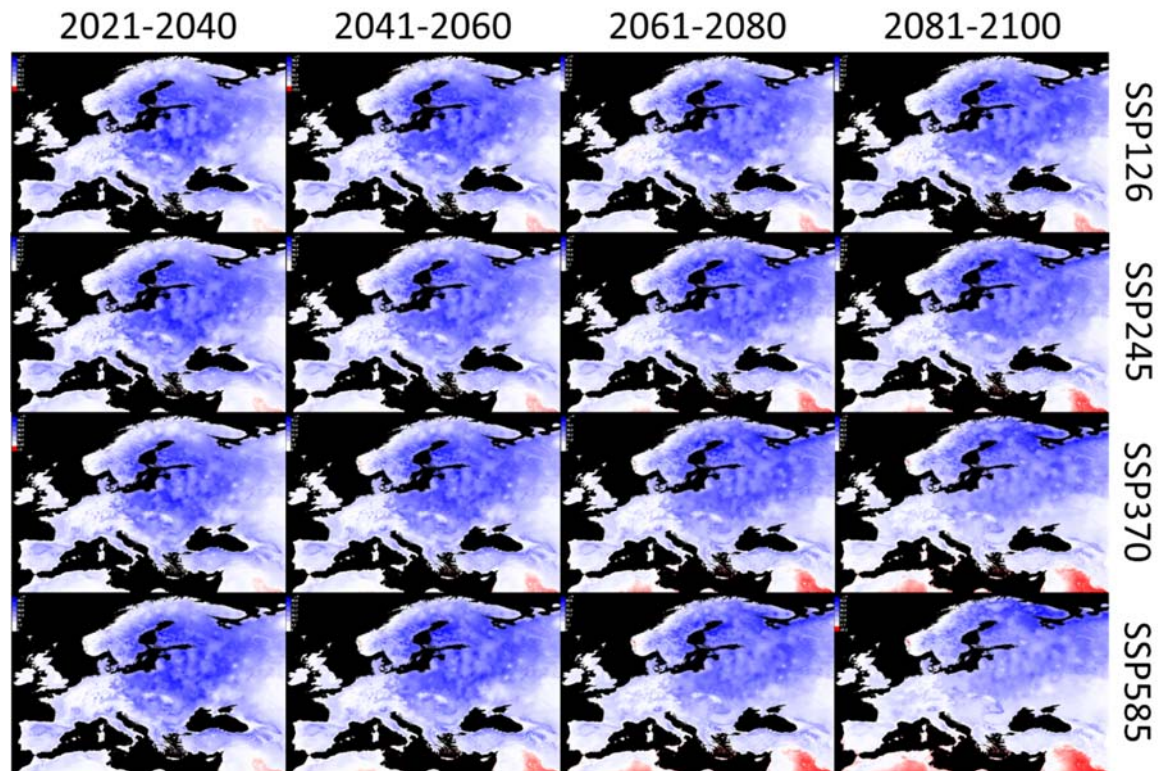

Figure S9: Results of the Maxent MESS analysis. Multidimensional environmental similarity surface (MESS) analysis indicates areas where novel climate conditions exist in the projection layers. Areas in red have one or more bioclimatic variables outside the range covered by the near current climatic conditions (1970 – 2000) used for model training. Modelling results in these areas should be treated with strong caution. Projection: WGS 1984.

## Ticks on the move – climate change-induced range shifts of three tick species in Europe

Sarah Cunze, Gustav Glock, Judith Kochmann, Sven Klimpel

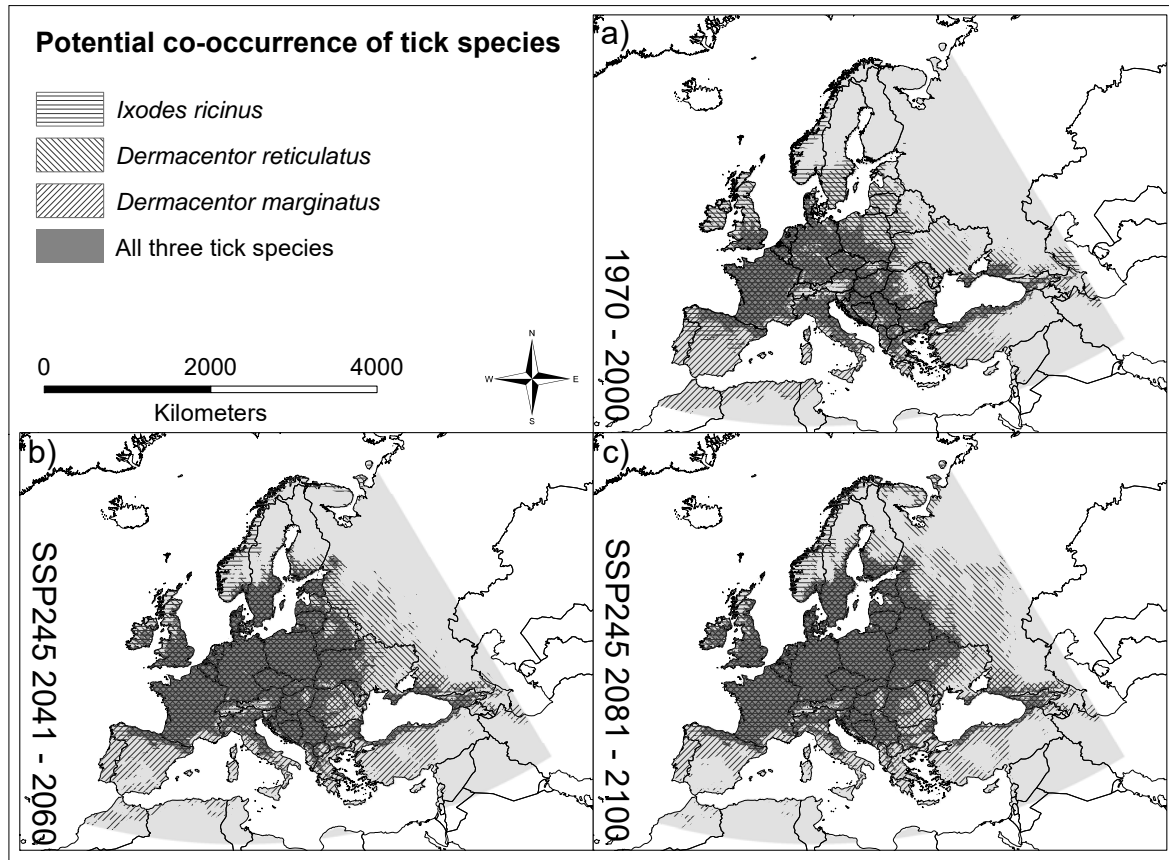

Figure S11: Potential co-occurrence under current and future climatic conditions. (Hatch-based Version of Figure 4 of the main document) a) under near current climatic conditions (1970-2000), b) under projected future climatic conditions (exemplarily for SSP 245) for the period 2041-2060, c) under projected future climatic conditions (SSP 245) for the period 2081-2100. Hatchings indicate areas where climatic suitability for the respective species is projected, for non mentioned species the area is climatically unsuitable according to the modelling results. The thresholds to transform the logistic model output (10% omission rate threshold) are: 0.3368 for *Ixodes ricinus*, 0.3816 for *Dermacentor reticulatus* and 0.4298 for *D. marginatus*. Maps were built using ESRI ArcGIS (Release 10.8, [www.esri.com](http://www.esri.com)). Projection: Europe Albers Equal Area Conic.

## Ticks on the move – climate change-induced range shifts of three tick species in Europe

Sarah Cunze, Gustav Glock, Judith Kochmann, Sven Klimpel

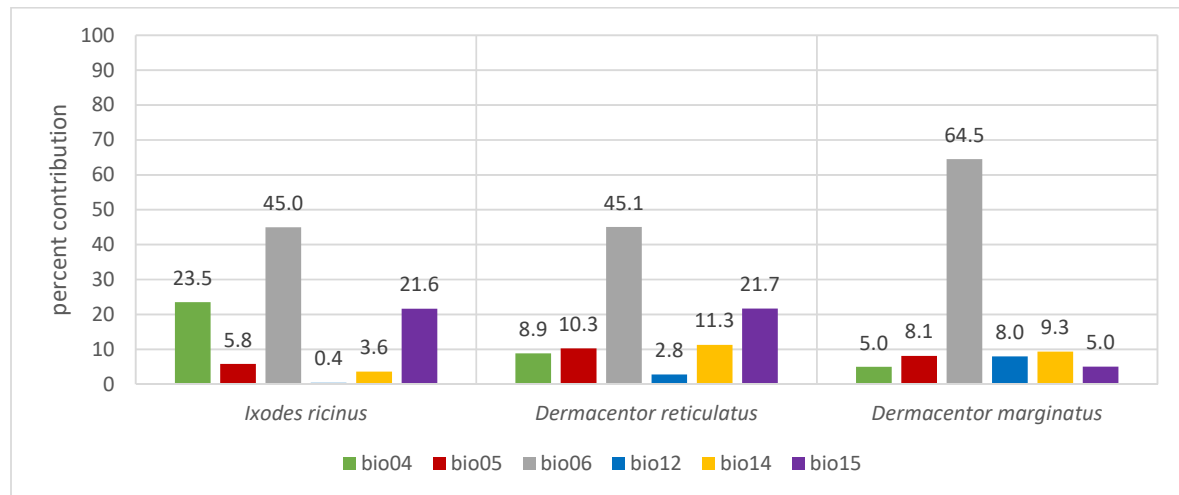

Figure S12: Estimates of relative contributions of the bioclimatic variables to the Maxent models for *Ixodes ricinus*, *Dermacentor reticulatus* and *Dermacentor marginatus*. Temperature seasonality (bio04), maximum temperature of warmest month (bio05), minimum temperature of coldest month (bio06), annual precipitation (bio12), precipitation of driest month (bio14) and precipitation seasonality (bio15).
